# Supplementary material for: Extracellular vesicle miRNome during subclinical mastitis in dairy cows
Source: Springer Nature journal article supplement (doi:10.1186/s13567-024-01367-x), 2024-09-19

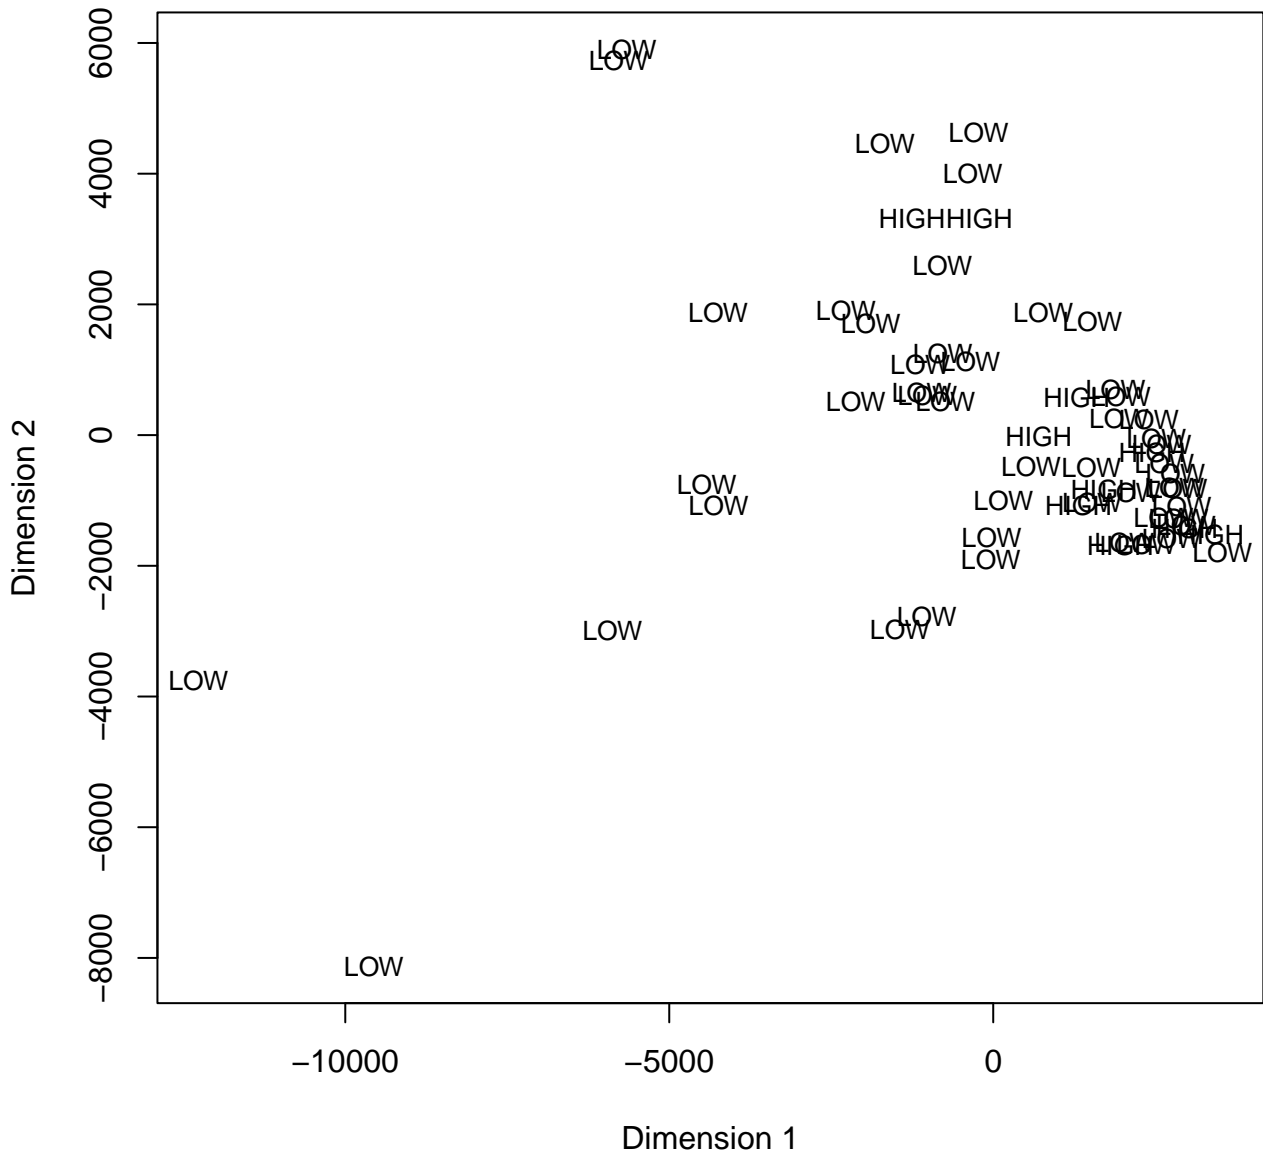

Supplement: MOESM1 [file 13567_2024_1367_MOESM1_ESM.pdf]
